# Supplementary material
Source: PubMed Central journal article supplement (PMC3653439)
Supplement: NIHMS460463-supplement-1.pdf [file NIHMS460463-supplement-1.pdf]

# Supplementary Material

## AID-dependent uracils in immunoglobulin gene variable and switch regions

### **Authors:**

Robert W. Maul, Huseyin Saribasak, Stella A. Martomo, Rhonda L. McClure, William Yang, Alexandra Vaisman, Hillary S. Gramlich, David G. Schatz, Roger Woodgate, David M. Wilson III, and Patricia J. Gearhart

### **Content:**

Supplementary Figures 1-4  
Supplementary Table 1  
Supplementary Methods

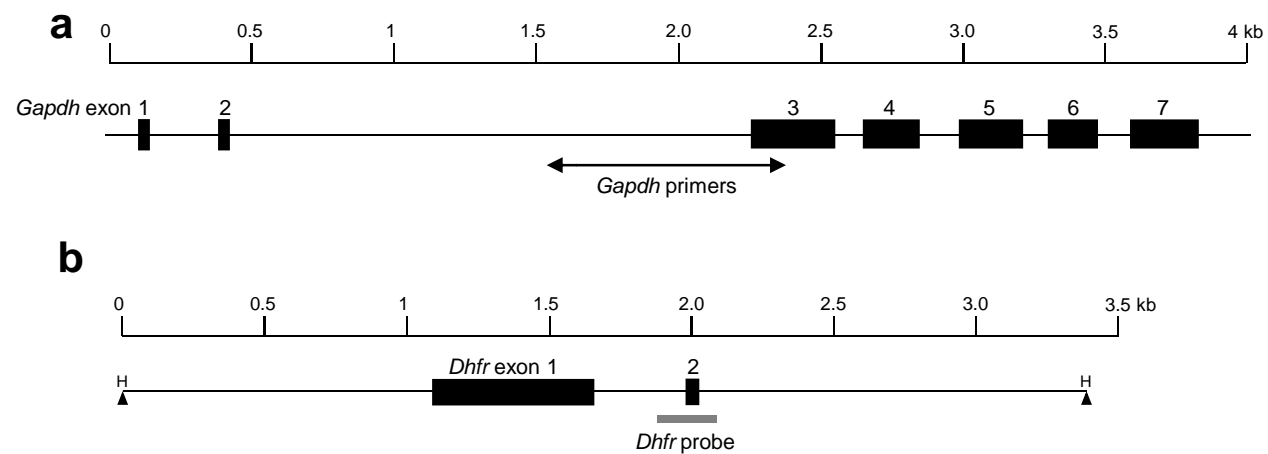

**Supplementary Figure 1.** Map of primers and probes for controls. **(a)** *Gapdh* primers for qPCR amplify 837 bp. **(b)** *Dhfr* probe for Southern. The 200 bp probe spans exon 2 and detects a 3.4 kb HindIII (H) fragment.

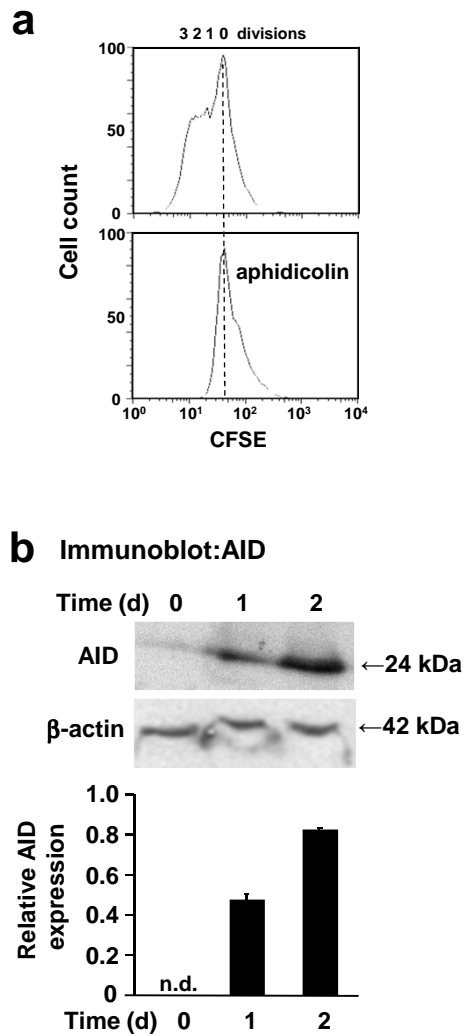

**Supplementary Figure 2.** Expression of AID after aphidicolin treatment. **(a)** Aphidicolin blocks cell division. Cells were stained with CFSE and stimulated *ex vivo* in the absence or presence of aphidicolin, and examined after 72 h. **(b)** Aphidicolin does not prevent AID expression. Quantification is shown for 3 independent blots comparing the ratio of AID to  $\beta$ -actin with SEM.

**a**

1 TTCTTGTGTG ACACCAAGAA  $\nabla$ TTGGCATAAT  $\nabla$ GTCTGAGTTG  $\square$ CCCAAGGGTG ATCTT $\square$ AGCTA

61 GACTCTGGGG TTTTGTGCGG  $\nabla$ GTACAGAGGA AAAACCCACT ATTGTGATTA CTATGCATATG  $\nabla$  J<sub>H</sub>4

121 GACTACTGGG  $\nabla$ GTCAAGGAAC CTCAGTCACC  $\nabla$ GTCTCCTCAG  $\nabla$ GTAAGAATGG CCTCTCCAGG

181 TCTTTATTTT TAACCTTTGT TATGGAGTTT  $\nabla$ TCTGAGCAT $\square$ GCAGACTAAT  $\triangle$ CTTGGATATT

241  $\square$ TGCCCTGAGG  $\square$ GAGCCGGCTG AGAGAAGTTG GGAAATAAAT CTGTCTAGGG  $\nabla$ ATCTCAGAGC $\triangle$

301 CTTTAGGACA  $\triangle$ GATTATCTCC ACATCTTTGA  $\triangle$ AAAAC $\nabla$ TAAGA  $\nabla$ ATCTGTGTGA TGGTGTGGT

361  $\nabla$ GGAGTCCCTG  $\nabla$ GATGATGGG $\nabla$  TAGGGACTTT  $\nabla$ GGAGGCTCAT TTGAAGAAGA  $\triangle$  $\square$ TGCTAAAACA

421 ATCCTATGGC $\nabla$  TGGAGGGATA  $\triangle$ GTTGGGGCTG  $\triangle$ TAGTTGGAGA TTTT $\nabla$ CAGTTT  $\nabla$ TTAGAATAAA

481 AGTATTAGTT  $\triangle$ GTGGAATATA  $\triangle$ CTTCAGGACC  $\triangle$ ACCTCTGTGA  $\triangle$  $\square$ CAGCATTTAT  $\triangle$ ACAGTATCCG

541  $\square$ ATGCATAGGG ACAAAGAGTG $\nabla$  GAGTGGGGCA $\nabla$  CTTTCTTTAG $\nabla$  ATTTGTGAGG $\nabla$  AATGTTCCGC $\nabla$

601  $\nabla$ ACTAGATTGT $\triangle$  TTAAAACTTC $\triangle$  ATTTGTTGGA AGGAGAGCTG $\nabla$  TCTTAGTGAT

**b**

|                                                      | C  | G  | T  | A  |
|------------------------------------------------------|----|----|----|----|
| <i>Ung</i> <sup>-/-</sup>                            | 29 | 13 | 15 | 13 |
| <i>Ung</i> <sup>-/-</sup> <i>Msh2</i> <sup>-/-</sup> | 17 | 12 | 11 | 8  |

**c**

|                                                      | #Linkers<br>at C | #Linkers<br>in WGC | %Linkers in WGC<br>(%WGC in sequence) |
|------------------------------------------------------|------------------|--------------------|---------------------------------------|
| <i>Ung</i> <sup>-/-</sup>                            | 24               | 5                  | 21 (11)                               |
| <i>Ung</i> <sup>-/-</sup> <i>Msh2</i> <sup>-/-</sup> | 16               | 4                  | 25 (11)                               |

**Supplementary Figure 3.** Sequence context of LM-PCR linker sites. **(a)** Sequence of the J<sub>H</sub>4 region. J<sub>H</sub>4 gene is underlined. WGC hotspot motifs are highlighted with a box. Linker sites are designated by closed triangles for *Ung*<sup>-/-</sup> samples, and open triangles for *Ung*<sup>-/-</sup>*Msh2*<sup>-/-</sup>. **(b)** Number of breaks analyzed. Several breaks occurred within V genes rearranged to J<sub>H</sub>4 (5 from *Ung*<sup>-/-</sup> and 1 from *Ung*<sup>-/-</sup>*Msh2*<sup>-/-</sup>), which were not utilized for the hotspot analysis. **(c)** Linkers found within the WGC hotspot motif. The % of linkers was compared to the total % of all C bases in the WGC motif (11%). Data derived from ~50 amplifications using genomic DNA from 6-9 mice from each strain.

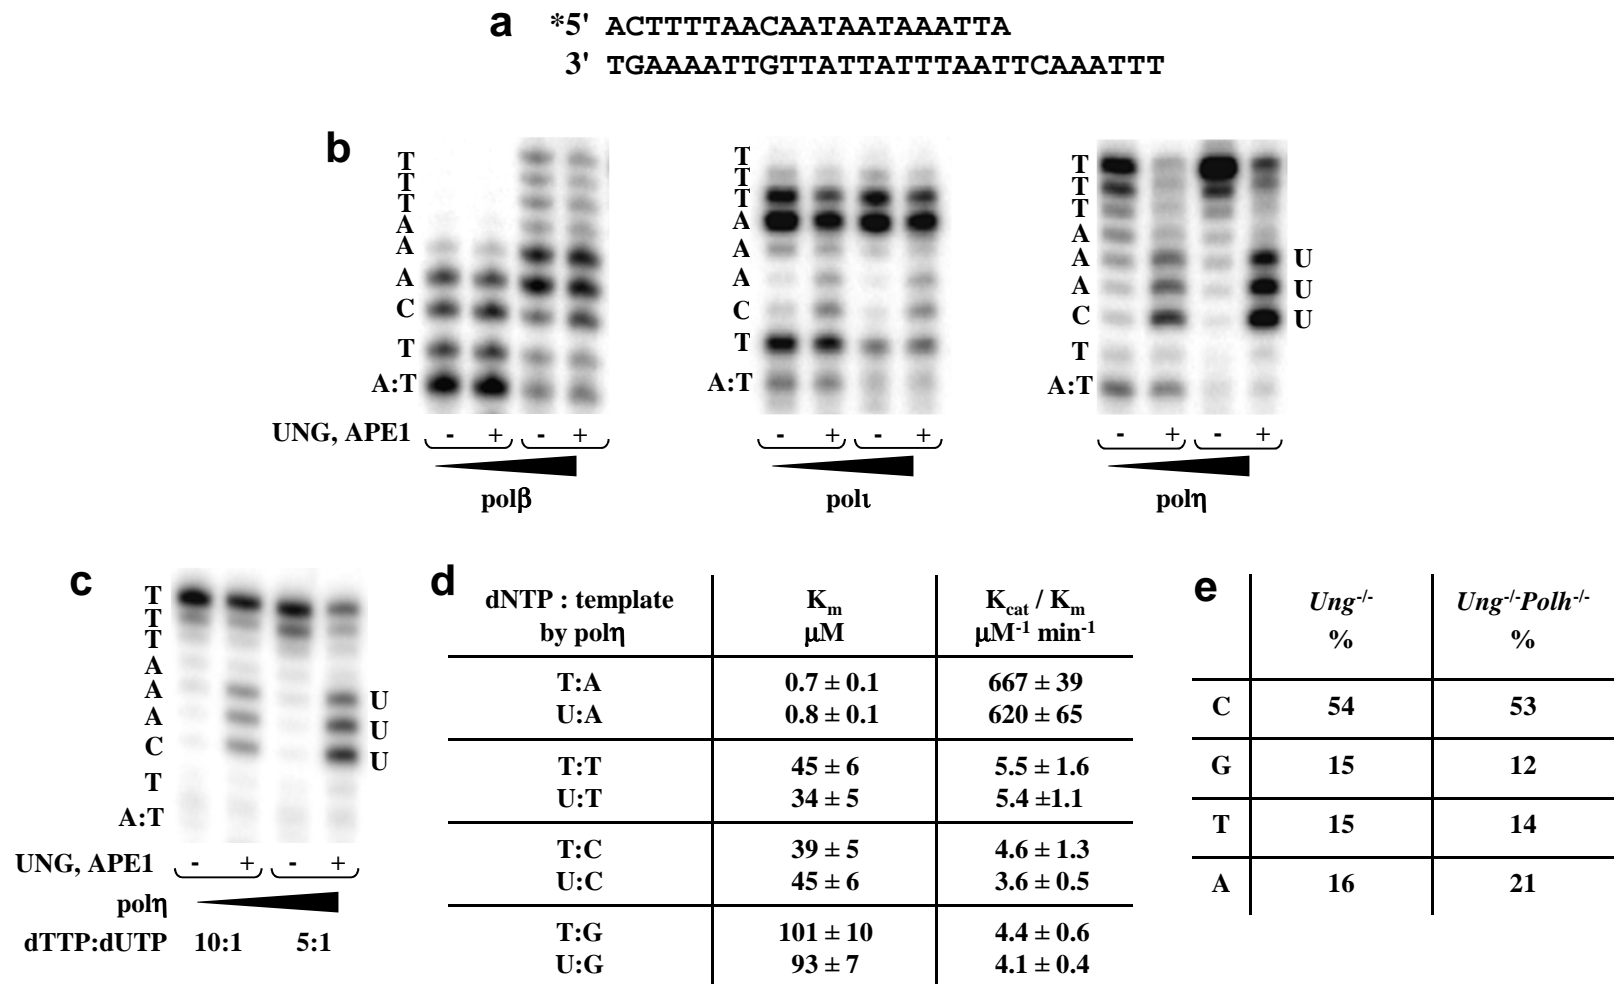

**Supplementary Figure 4.** Incorporation of dUTP opposite template A by different polymerases during replication, described in **Supplementary Methods**. **(a)** Sequence of the primer/template used in replication assays. **(b)** Polymerases (pol) were examined for uracil incorporation in the presence of equal concentrations of dATP, dTTP, dCTP, dGTP, and dUTP. Increased cleavage products after UNG and APE1 digestion represent uracils. **(c)** Polη efficiently incorporates dU opposite template A even when dTTP is in excess of dUTP. **(d)** Kinetic analysis of dUTP incorporation by polη. **(e)** LM-PCR linker location in *Ung*<sup>-/-</sup> and *Ung*<sup>-/-</sup>*Polh*<sup>-/-</sup> clones. Number of clones sequenced: *Ung*<sup>-/-</sup>, 69; *Ung*<sup>-/-</sup>*Polh*<sup>-/-</sup>, 20.

**Supplementary Table 1: Oligonucleotide primers and probes**

| Assay                                 | Name                               | Oligonucleotide (5' → 3', 5' overhang in lower case) |                                       |
|---------------------------------------|------------------------------------|------------------------------------------------------|---------------------------------------|
| DT40 C <sub>λ</sub> - Southern probe  | ggIgλ external                     | Forward                                              | GTGACACCTGGAGAGATGAGGG                |
|                                       |                                    | Reverse                                              | ACAGAGGTGCATGTGTGTCTGTAC              |
|                                       | ggIgλ internal                     | Forward                                              | AGGAGTCGACAGGCAGAGG                   |
|                                       |                                    | Reverse                                              | CAGCCATACATACGCGTGTGG                 |
| DT40 V <sub>λ</sub> - qPCR            | DT1F                               | Forward                                              | CGCAGGGAGTTATTTGCAT                   |
|                                       | DT2R                               | Reverse                                              | GGAGAATCGTGAAGGGATGT                  |
| DT40 C <sub>λ</sub> - qPCR            | DTNR6F                             | Forward                                              | ATACGCACACGTATAACATCCATG              |
|                                       | ggCλ 3RT                           | Reverse                                              | GAGGAGTCGACAGGCAGAGGTG                |
| Mouse S <sub>μ</sub> - Southern probe | S7 external                        | Forward                                              | GTGAGCTGAGCTAGGGTGA                   |
|                                       |                                    | Reverse                                              | TTTTCCCAGCTCATCCCGAA                  |
|                                       | S7 internal                        | Forward                                              | ggaattcGTGAGCTGAGCTGAGGTGAA           |
|                                       |                                    | Reverse                                              | cgggatccCCAGGCCCTACTCAGCCTA           |
| Mouse Dhfr - Southern probe           | DHFR external                      | Forward                                              | CACACCCACACCGGACTTGCACC               |
|                                       |                                    | Reverse                                              | CAGAGATCCCAGATTCCCAGG                 |
|                                       | DHFR internal                      | Forward                                              | CGTCGCTGAATGGAGCCTGAGC                |
|                                       |                                    | Reverse                                              | CGAGCTATATGCACTTGC                    |
| VDJ - qPCR                            | 5'VDJ                              | Forward                                              | AGCCTGACATCTGAGGACTCTGC               |
|                                       | 3'Jh4                              | Reverse                                              | GTCAGTTCTACACAAACAAGACCTCAAATTGATTGAC |
| Gapdh - qPCR                          | GAPDH 1439F                        | Forward                                              | GAGACGGCCGCATCTTCTTGTG                |
|                                       | GAPDH 2276R                        | Reverse                                              | GACTTCCACCCAGCCGAG                    |
| S <sub>μ</sub> - qPCR                 | Ch5f49991                          | Forward                                              | GAATCTATTCTGGCTCTTCTTAAGCAG           |
|                                       | Ch6r49133                          | Reverse                                              | CCATCTCAGCTACTCCAGAGTATCTC            |
| V <sub>κ</sub> - qPCR                 | 1 <sup>st</sup> 5'V <sub>κ</sub> 4 | Forward                                              | TGGAGGCTGAAGATGCTGCC                  |
|                                       | J <sub>κ</sub> 2 3RT               | Reverse                                              | CCCTTACAAAACCTGGTCTCAGAAGCCT          |
| C <sub>κ</sub> - qPCR                 | C <sub>κ</sub> 5RT                 | Forward                                              | GTCCCATGTGGTTACAAACCATTAGACCAG        |
|                                       | C <sub>κ</sub> 3RT                 | Reverse                                              | CACTCATTCCTGTTGAAGCTCTTGACA           |
| J <sub>H</sub> 4 - LM-PCR             | 3'Jh3116                           | Forward                                              | GAGCTCACTCCCATTCCTCGG                 |
|                                       | 3'Jh2906                           | Forward                                              | GTGTTCCTTTGAAAGCTGGAC                 |
|                                       | LL4                                | Reverse                                              | ATGCACTACATACAGTCATCCGGAG             |
|                                       | 3'Jh2826Bam                        | Forward                                              | cacggatccTAGATGCCTTTCTCCCTTGACTCA     |
|                                       | LL2                                | Reverse                                              | CAGTCATCCGGAGATCTGAATTC               |
|                                       | 3'Jh2732                           | Hybridization Probe                                  | GTTGGAAGGAGCTGTCTTAGTG                |
| Gapdh - LM-PCR                        | GAPDH-F                            | Forward                                              | TCCACCACCGTGTGCTGTAG                  |
|                                       | GAPDH-R                            | Reverse                                              | GACCACAGTCCATGCCATCACT                |
| Linker - LM-PCR                       | Top                                | Linker                                               | ATGCACTACATACAGTCATCCGGAGATCTGAATTC   |
|                                       | Bottom                             | Linker                                               | GAATTCAGATCTCC                        |

## Supplementary Methods

**DNA polymerases and reaction template.** Human DNA pol $\beta$  was a generous gift of S. Wilson (NIEHS, NIH). GST-tagged human pol $\iota$  and His-tagged human pol $\eta$  were purified from baculovirus infected insect cells as previously described<sup>1,2</sup>. The replication template was constructed by annealing the template with <sup>32</sup>P-labeled primer at a 1.5:1 molar ratio. Hybridization was achieved by heating the required mixture of oligonucleotides in an annealing buffer (50 mM Tris-HCl-pH 8, 50  $\mu$ g/ml BSA, 1.42 mM 2-mercaptoethanol) for 10 min at 100 °C followed by slow cooling to 21 °C over a period of about 2 h. Annealing efficiencies were >95%, as evidenced by the different mobility of the <sup>32</sup>P-labeled primers before and after hybridization to the template on non-denaturing polyacrylamide gels.

**Primer extension assays.** 100 fmol of primer-template (expressed as primer termini) was incubated with pols  $\beta$ ,  $\iota$ , or  $\eta$  at 37 °C for 5 min in 10- $\mu$ l reactions containing 100  $\mu$ M of all four dNTPs with or without dUTP, 40 mM Tris-HCl pH 8.0, 1 mM MgCl<sub>2</sub>, 10 mM dithiothreitol, 250  $\mu$ g/ml bovine serum albumin, and 2.5% glycerol; 100 mM NaCl was added in reactions with pol $\beta$  and pol $\eta$ . Enzymes were used at two concentrations: 0.02 and 0.2 nM for pol $\beta$ , 100 and 200 nM for pol $\iota$ , and 1 and 2 nM for pol $\eta$ . Reactions were terminated by mixing with 1 volume of formamide loading dye solution containing 500 mM EDTA, 0.1% xylene cyanol, and 0.1% bromophenol blue in 90% formamide. Before loading onto the gel, the reactions were denatured by heating at 100 °C for 10 min and immediately transferred into ice for 2 min. Products were resolved by denaturing polyacrylamide gel electrophoresis (8 M urea, 20% acrylamide, 4 h at 2000 V) and then visualized using a Fuji PhosphorImager.

**Kinetic analysis of replication products.** Steady-state kinetic parameters  $K_m$  and  $V_{max}$  for dTTP and dUTP incorporation were measured in standing-start reactions as described previously<sup>1</sup>. Initial time-course studies were performed to ensure that the reactions were in the linear range. The efficiencies of nucleotide incorporation were determined in 5 min reactions. 100 fmol of DNA substrates were replicated at 37 °C in 10  $\mu$ l reaction mixtures containing 1 fmol of pol $\eta$  and variable concentrations of nucleotides. Reaction products were separated in a 20% polyacrylamide gel containing 8 M urea, and then visualized and quantified using a Fuji PhosphorImager and Image Gauge software. The velocity of dNTP incorporation was determined by dividing the percent of product generated by the respective time of the reaction. The apparent  $V_{max}$  and  $K_m$  were determined from a Hanes-Woolf plot by linear least squares fit using the Sigma Plot software. The efficiency of nucleotide insertion by a polymerase was calculated as  $k_{cat}/K_m$ .

1. Tissier, A., McDonald, J.P., Frank, E.G. & Woodgate, R. pol $\iota$ , a remarkably error-prone human DNA polymerase. *Genes Dev* **14**, 1642-1650 (2000).
2. Masutani, C., Kusumoto, R., Iwai, S. & Hanaoka, F. Mechanisms of accurate translesion synthesis by human DNA polymerase  $\eta$ . *EMBO J* **19**, 3100-3109 (2000).
